# Supplementary material for: Transformation of highly ordered large pore silica mesophases (Fm3m, Im3m and p6mm) in a ternary triblock copolymer–butanol–water system
Source: Royal Society of Chemistry journal article supplement (doi:10.1039/b403903c), 2004-01-01
Supplement: b403903c.doc [file b403903c.doc]

**Electronic Supporting Information**

**Figure S1.** TEM images of samples S0 (a), S3 (b), and S4 (c) (Phillips F20 Tecnai, operated at 160 kV). The projections in pictures (a), (b), and (c) correspond respectively to *Fm*3*m*, *Im*3*m*, and *p*6*mm* lattice symmetry. Scale bar 50 nm.

**Figure S2.** Nitrogen sorption isotherms at 77 K of samples S1, S2, S3 and S4 (Quantachrome Autosorb-1MP). The isotherms of S2, S3 and S4 are shifted by 100, 200 and 350 cm3/g (STP), respectively.
